# Supplementary material for: The epidermis coordinates thermoresponsive growth through the phyB-PIF4-auxin pathway
Source: PubMed Central journal article supplement (PMC7044213; doi:10.1038/s41467-020-14905-w), 2020-02-26
Supplement: 41467_2020_14905_MOESM3_ESM.pdf [file 41467_2020_14905_MOESM3_ESM.pdf]

## **Description of Additional Supplementary Files**

File Name: Supplementary Data 1

Description: List of tissue-specific PIF4-regulated genes

File Name: Supplementary Data 2

Description: List of epidermal or vascular PIF4-regulated genes and auxin-regulated genes

File Name: Supplementary Data 3

Description: Comparison of epidermal or vascular PIF4-regulated genes with PIF4 direct target genes
